# Supplementary material
Source: Springer Nature journal article supplement (https://www.springermedizin.de/resource/supplementary/12916_2012_744_MOESM4_ESM.pdf/9598696)
Supplement: MOESM4 [file 9598696]

# Managing your sleep-wake cycle

If you tick 'YES' to one or more of the boxes below, you may find 'SLEEP-WAKE CYCLE MANAGEMENT' helpful.

For more than TWO WEEKS:

YES NO

- Have you been tired all the time?  YES  NO
- Have you been spending more time in bed?  YES  NO
- Have you had poor quality or fewer hours of sleep?  YES  NO
- Have you been napping during the day?  YES  NO
- Have you cut down on physical activity?  YES  NO

Depression usually leads to:

- Difficulty getting to sleep
- Poor quality sleep
- Fewer hours of sleep
- More awakenings during the night
- In severe cases, waking very early in the morning and being unable to get back to sleep, and
- Daytime tiredness.

## Sleep structure

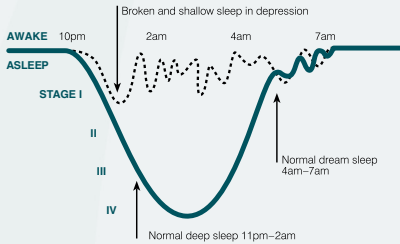

Poor quality of deep sleep leads to:

- Daytime fatigue
- Poor concentration
- Irritability
- Musculoskeletal aches and pains
- Reduced immune function, and
- Prolonged depression.

## The hormonal body clock

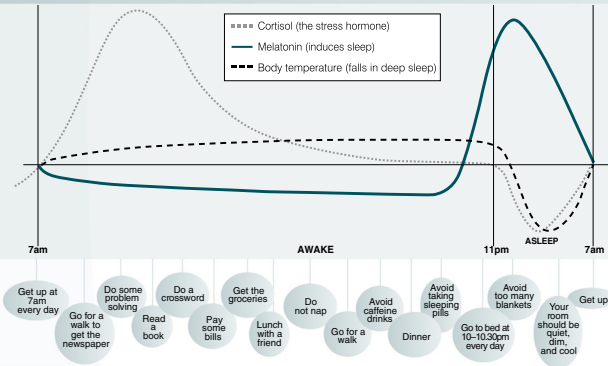

## Worksheet for activity planning and sleep-wake cycle management

| ACTIVITIES                                                                 | DAY 1 | DAY 2 | DAY 3 | DAY 4 | DAY 5 | DAY 6 | DAY 7 |
|----------------------------------------------------------------------------|-------|-------|-------|-------|-------|-------|-------|
| Time of getting up                                                         |       |       |       |       |       |       |       |
| MORNING                                                                    |       |       |       |       |       |       |       |
| 7am                                                                        |       |       |       |       |       |       |       |
| 8am                                                                        |       |       |       |       |       |       |       |
| 9am                                                                        |       |       |       |       |       |       |       |
| 10am                                                                       |       |       |       |       |       |       |       |
| 11am                                                                       |       |       |       |       |       |       |       |
| 12 noon                                                                    |       |       |       |       |       |       |       |
| AFTERNOON                                                                  |       |       |       |       |       |       |       |
| 1pm                                                                        |       |       |       |       |       |       |       |
| 2pm                                                                        |       |       |       |       |       |       |       |
| 3pm                                                                        |       |       |       |       |       |       |       |
| 4pm                                                                        |       |       |       |       |       |       |       |
| 5pm                                                                        |       |       |       |       |       |       |       |
| 6pm                                                                        |       |       |       |       |       |       |       |
| EVENING                                                                    |       |       |       |       |       |       |       |
| 7pm                                                                        |       |       |       |       |       |       |       |
| 8pm                                                                        |       |       |       |       |       |       |       |
| 9pm                                                                        |       |       |       |       |       |       |       |
| 10pm                                                                       |       |       |       |       |       |       |       |
| Time of going to bed                                                       |       |       |       |       |       |       |       |
| Number of hours asleep                                                     |       |       |       |       |       |       |       |
| Rate your sleep quality on a scale of 0-5 (0=bad, 5=excellent)             |       |       |       |       |       |       |       |
| Rate your mood today on a scale of 0-5 (0=bad, 5=excellent)                |       |       |       |       |       |       |       |
| Rate how tired you are today on a scale of 0-5 (0=very tired, 5=energetic) |       |       |       |       |       |       |       |
